# Supplementary material
Source: MDPI journal article supplement (https://www.mdpi.com/2073-4395/12/12/3166)
Supplement: s1 [file s1 › agronomy-2050198-supplementary.pdf]

**Table S1.** The acceptable daily intake (ADI, mg/kg body weight), Chinese dietary pattern, supervised trials median residues (STMR, mg/kg), the corresponding MRLs registered, and risk quotient (RQ, %) of thiacloprid in dry tea when PHIs was 14 days.

| Classification                 | Fi     | STMR or<br>MRL (mg/kg) | Source of<br>Residues | NEDI<br>(mg) | ADI (mg/ kg bw) | RQ <sub>c</sub> (%) |
|--------------------------------|--------|------------------------|-----------------------|--------------|-----------------|---------------------|
| Rice and its products          | 0.2399 | 0.02                   | China                 | 0.00480      |                 |                     |
| Flour and its products         | 0.1385 | 0.1                    | China                 | 0.01385      |                 |                     |
| Other cereals                  | 0.0233 |                        |                       |              |                 |                     |
| Tubers                         | 0.0495 | 0.02                   | China                 | 0.00099      |                 |                     |
| Dried beans and their products | 0.016  |                        |                       |              |                 |                     |
| Vegetable (Darker)             | 0.0915 | 0.5                    | China                 | 0.04575      |                 |                     |
| Vegetable (Light color)        | 0.1837 | 1.0                    | China                 | 0.18370      |                 |                     |
| Pickles                        | 0.0103 |                        |                       |              |                 |                     |
| Fruits                         | 0.0457 | 1.0                    | China                 | 0.04570      |                 |                     |
| Nuts                           | 0.0039 |                        |                       |              | 0.01 × 63       |                     |
| Livestock                      | 0.0795 |                        |                       |              |                 |                     |
| Milk                           | 0.0263 |                        |                       |              |                 |                     |
| Egg                            | 0.0236 |                        |                       |              |                 |                     |
| Fish                           | 0.0301 |                        |                       |              |                 |                     |
| Vegetable oil                  | 0.0327 | 0.02                   | China                 | 0.00065      |                 |                     |
| Animal oil                     | 0.0087 |                        |                       |              |                 |                     |
| Sugar, starch                  | 0.0044 |                        |                       |              |                 |                     |
| Salt                           | 0.012  | 0.26                   | STMR                  | 0.00312      |                 |                     |
| Soy sauce                      | 0.009  |                        |                       |              |                 |                     |
| Total                          | 1.0286 |                        |                       | 0.29856      | 0.63            | 47.4                |

**Table S2.** The acceptable daily intake (ADI, mg/kg body weight), Chinese dietary pattern, supervised trials median residues (STMR, mg/kg), the corresponding MRLs registered, and risk quotient (RQ, %) of thiacloprid in dry tea when PHIs was 21 days.

| Classification                 | Fi     | STMR or<br>MRL (mg/kg) | Source of<br>Residues | NEDI (mg) | ADI (mg/ kg bw) | RQ <sub>c</sub> (%) |
|--------------------------------|--------|------------------------|-----------------------|-----------|-----------------|---------------------|
| Rice and its products          | 0.2399 | 0.02                   | China                 | 0.00480   |                 |                     |
| Flour and its products         | 0.1385 | 0.1                    | China                 | 0.01385   |                 |                     |
| Other cereals                  | 0.0233 |                        |                       |           |                 |                     |
| Tubers                         | 0.0495 | 0.02                   | China                 | 0.00099   |                 |                     |
| Dried beans and their products | 0.016  |                        |                       |           |                 |                     |
| Vegetable (Darker)             | 0.0915 | 0.5                    | China                 | 0.04575   |                 |                     |
| Vegetable (Light color)        | 0.1837 | 1.0                    | China                 | 0.18370   |                 |                     |
| Pickles                        | 0.0103 |                        |                       |           |                 |                     |
| Fruits                         | 0.0457 | 1.0                    | China                 | 0.04570   |                 |                     |
| Nuts                           | 0.0039 |                        |                       |           | 0.01 × 63       |                     |
| Livestock                      | 0.0795 |                        |                       |           |                 |                     |
| Milk                           | 0.0263 |                        |                       |           |                 |                     |
| Egg                            | 0.0236 |                        |                       |           |                 |                     |
| Fish                           | 0.0301 |                        |                       |           |                 |                     |
| Vegetable oil                  | 0.0327 | 0.02                   | China                 | 0.00065   |                 |                     |
| Animal oil                     | 0.0087 |                        |                       |           |                 |                     |
| Sugar, starch                  | 0.0044 |                        |                       |           |                 |                     |
| Salt                           | 0.012  | 0.17                   | STMR                  | 0.00204   |                 |                     |
| Soy sauce                      | 0.009  |                        |                       |           |                 |                     |
| Total                          | 1.0286 |                        |                       | 0.29748   | 0.63            | 47.2                |

**Table S3.** The acceptable daily intake (ADI, mg/kg body weight), Chinese dietary pattern, supervised trials median residues (STMR, mg/kg), the corresponding MRLs registered, and risk quotient (RQ, %) of tolfeprad in dry tea when PHIs was 14 days.

| Classification                 | Fi     | STMR or<br>MRL (mg/kg) | Source of<br>Residues | NEDI<br>(mg) | ADI (mg/ kg bw) | RQ <sub>c</sub> (%) |
|--------------------------------|--------|------------------------|-----------------------|--------------|-----------------|---------------------|
| Rice and its products          | 0.2399 |                        |                       |              |                 |                     |
| Flour and its products         | 0.1385 |                        |                       |              |                 |                     |
| Other cereals                  | 0.0233 |                        |                       |              |                 |                     |
| Tubers                         | 0.0495 |                        |                       |              |                 |                     |
| Dried beans and their products | 0.016  |                        |                       |              |                 |                     |
| Vegetable (Darker)             | 0.0915 |                        |                       |              |                 |                     |
| Vegetable (Light color)        | 0.1837 | 0.5                    | China                 | 0.09185      |                 |                     |
| Pickles                        | 0.0103 |                        |                       |              |                 |                     |
| Fruits                         | 0.0457 |                        |                       |              |                 |                     |
| Nuts                           | 0.0039 |                        |                       |              | 0.006 × 63      |                     |
| Livestock                      | 0.0795 |                        |                       |              |                 |                     |
| Milk                           | 0.0263 |                        |                       |              |                 |                     |
| Egg                            | 0.0236 |                        |                       |              |                 |                     |
| Fish                           | 0.0301 |                        |                       |              |                 |                     |
| Vegetable oil                  | 0.0327 |                        |                       |              |                 |                     |
| Animal oil                     | 0.0087 | 0.01                   | China                 | 0.00087      |                 |                     |
| Sugar, starch                  | 0.0044 |                        |                       |              |                 |                     |
| Salt                           | 0.012  | 1.34                   | STMR                  | 0.01608      |                 |                     |
| Soy sauce                      | 0.009  |                        |                       |              |                 |                     |
| Total                          | 1.0286 |                        |                       | 0.10802      | 0.378           | 28.6                |

**Table S4.** The acceptable daily intake (ADI, mg/kg body weight), Chinese dietary pattern, supervised trials median residues (STMR, mg/kg), the corresponding MRLs registered, and risk quotient (RQ, %) of tolfeprad in dry tea when PHIs was 21 days.

| Classification                 | Fi     | STMR or<br>MRL (mg/kg) | Source of<br>Residues | NEDI<br>(mg) | ADI (mg/ kg bw) | RQ <sub>c</sub> (%) |
|--------------------------------|--------|------------------------|-----------------------|--------------|-----------------|---------------------|
| Rice and its products          | 0.2399 |                        |                       |              |                 |                     |
| Flour and its products         | 0.1385 |                        |                       |              |                 |                     |
| Other cereals                  | 0.0233 |                        |                       |              |                 |                     |
| Tubers                         | 0.0495 |                        |                       |              |                 |                     |
| Dried beans and their products | 0.016  |                        |                       |              |                 |                     |
| Vegetable (Darker)             | 0.0915 |                        |                       |              |                 |                     |
| Vegetable (Light color)        | 0.1837 | 0.5                    | China                 | 0.09185      |                 |                     |
| Pickles                        | 0.0103 |                        |                       |              |                 |                     |
| Fruits                         | 0.0457 |                        |                       |              |                 |                     |
| Nuts                           | 0.0039 |                        |                       |              | 0.006 × 63      |                     |
| Livestock                      | 0.0795 |                        |                       |              |                 |                     |
| Milk                           | 0.0263 |                        |                       |              |                 |                     |
| Egg                            | 0.0236 |                        |                       |              |                 |                     |
| Fish                           | 0.0301 |                        |                       |              |                 |                     |
| Vegetable oil                  | 0.0327 |                        |                       |              |                 |                     |
| Animal oil                     | 0.0087 | 0.01                   | China                 | 0.00087      |                 |                     |
| Sugar, starch                  | 0.0044 |                        |                       |              |                 |                     |
| Salt                           | 0.012  | 0.31                   | STMR                  | 0.00372      |                 |                     |
| Soy sauce                      | 0.009  |                        |                       |              |                 |                     |
| Total                          | 1.0286 |                        |                       | 0.09566      | 0.378           | 25.3                |

**Table S5.** Acute dietary risk assessment of thiacloprid and tolfenpyrad in tea.

| Pesticide   | PHI (day) | HR (mg/kg) | ARfD (mg/kg bw) | LP (kg) | NESTI (mg/kg bw) | RQ <sub>a</sub> (%) |
|-------------|-----------|------------|-----------------|---------|------------------|---------------------|
| Thiacloprid | 14        | 1.23       | 0.03            | 0.07588 | 0.00120          | 4.94                |
|             | 21        | 0.93       | 0.03            | 0.07588 | 0.00090          | 3.74                |
| Tolfenpyrad | 14        | 4.00       | 0.01            | 0.07588 | 0.00482          | 48.2                |
|             | 21        | 2.35       | 0.01            | 0.07588 | 0.00289          | 28.3                |
